# Supplementary material
Source: Royal Society of Chemistry journal article supplement (doi:10.1039/d6nr00579a)
Supplement: d6nr00579a1.pdf [file d6nr00579a1.pdf]

Supporting Information

**Oxygen-vacancy-rich CoO<sub>x</sub> modified cubic platinum nanoparticles  
for highly efficient electrocatalytic ammonia oxidation reaction**

**Xuelong Duan,<sup>a</sup> Jie Wang,<sup>bd</sup> Linghui Kong,<sup>bd</sup> Haobo Pei,<sup>a</sup> Feng Gao,<sup>cd</sup> Gurong Shen<sup>\*ad</sup>**

<sup>a</sup>School of Materials Science and Engineering, Tianjin University, Tianjin 300350, P.R. China

<sup>b</sup>School of Chemical Engineering and Technology, Tianjin University, Tianjin 300350, P.R. China

<sup>c</sup>School of Mechanical Engineering, Tianjin University, Tianjin 300350, P.R. China

<sup>d</sup>National Rare Earth Catalysis Research Institute, Dongying 257092, P.R. China

\*Corresponding author at: School of Materials Science and Engineering, Tianjin University, Tianjin 300350, P.R. China; National Rare Earth Catalysis Research Institute, Dongying 257092, P.R. China.

E-mail address: gr\_shen@tju.edu.cn (G. Shen).

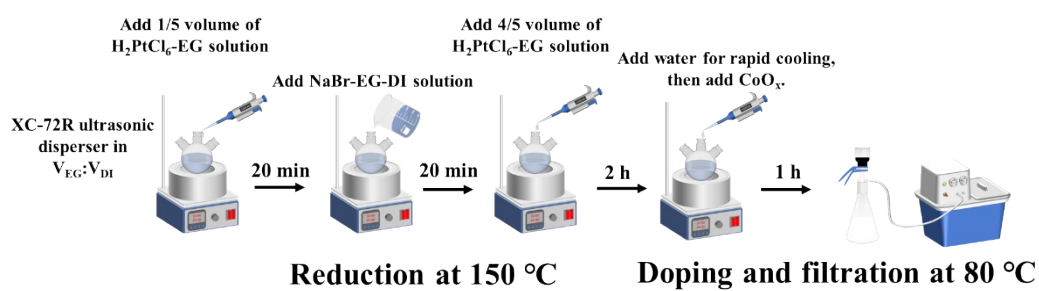

Figure. S1 Synthesis process of ammonia electrooxidation catalysts.

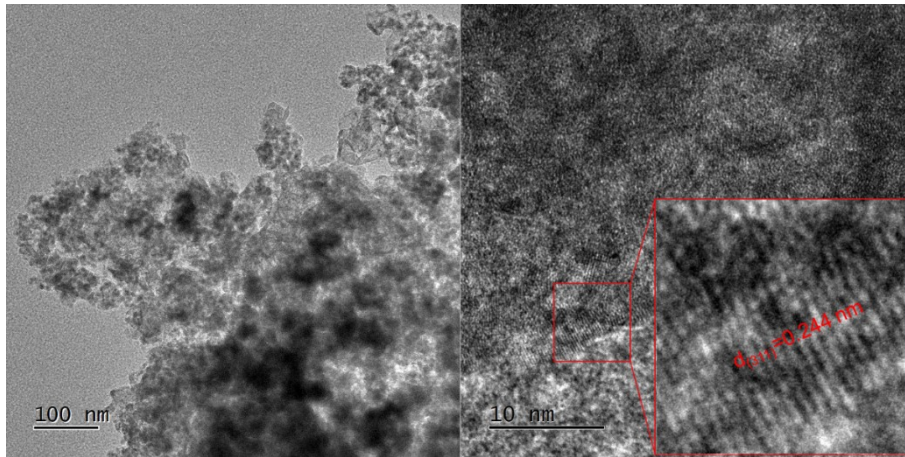

Figure. S2 TEM images of V<sub>0</sub>-rich CoO<sub>x</sub>.

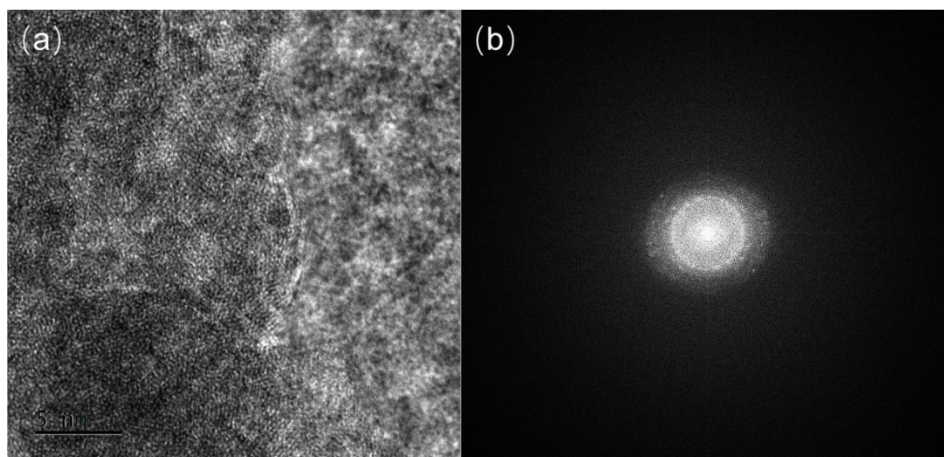

Figure. S3 (a) TEM images of V<sub>O</sub>-rich CoO<sub>x</sub> (b) Diffraction pattern of V<sub>O</sub>-rich CoO<sub>x</sub>.



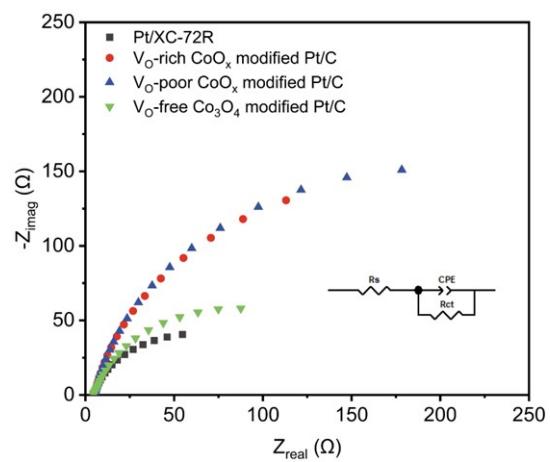

Figure. S5 Nyquist plots of EIS spectra measured for different catalysts in 1 M KOH + 0.1 M  $\text{NH}_3 \cdot \text{H}_2\text{O}$  at the 0.6 V vs. RHE.

Table. S1 Rs and Rct of different catalysts.

|                                                                   | Rs ( $\Omega$ ) | Rct ( $\Omega$ ) |
|-------------------------------------------------------------------|-----------------|------------------|
| Pt/XC-72R                                                         | 4.633           | 101.4            |
| V <sub>O</sub> -rich CoO <sub>x</sub> modified Pt/C               | 4.656           | 370.3            |
| V <sub>O</sub> -poor CoO <sub>x</sub> modified Pt/C               | 4.677           | 378.4            |
| V <sub>O</sub> -free Co <sub>3</sub> O <sub>4</sub> modified Pt/C | 4.766           | 151.8            |

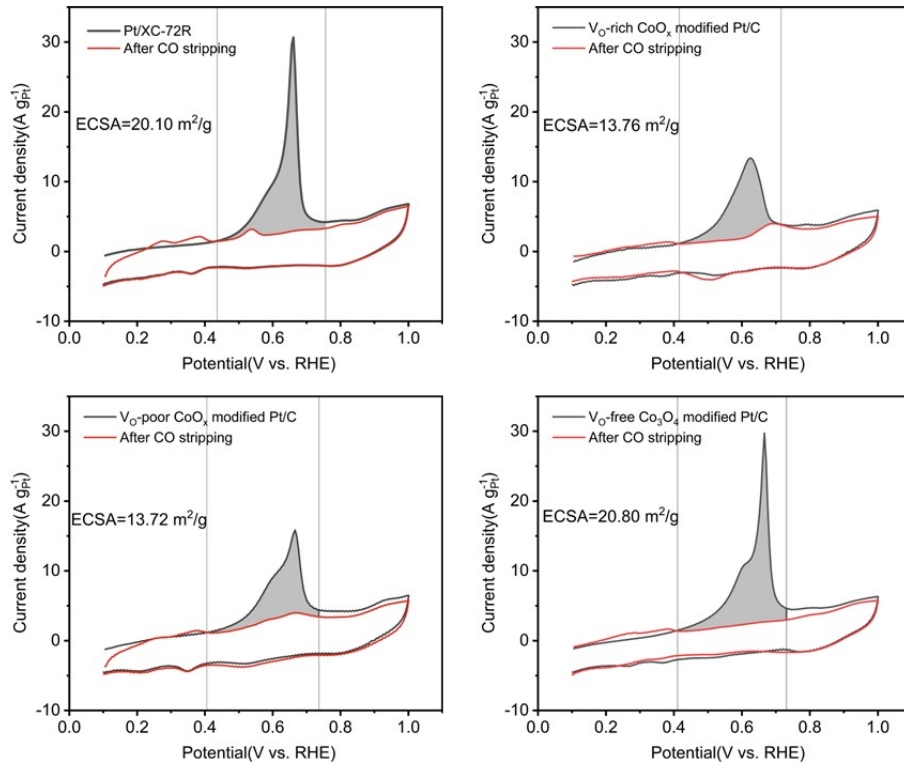

Figure. S6 CO stripping voltammograms for four catalysts.

Table. S2 ECSA of four catalysts via CO stripping voltammograms.

|                                                                  | $S_{\text{CO}}/M_{\text{Pt}}$<br>( $\text{A V g}^{-1}$ ) | $v$<br>( $\text{V s}^{-1}$ ) | ECSA<br>( $\text{m}^2 \text{g}^{-1}$ ) |
|------------------------------------------------------------------|----------------------------------------------------------|------------------------------|----------------------------------------|
| Pt/XC-72R                                                        | 1.69                                                     | 0.02                         | 20.10                                  |
| $\text{V}_\text{O}$ -rich $\text{CoO}_x$ -modified Pt/C          | 1.15                                                     | 0.02                         | 13.76                                  |
| $\text{V}_\text{O}$ -poor $\text{CoO}_x$ -modified Pt/C          | 1.15                                                     | 0.02                         | 16.72                                  |
| $\text{V}_\text{O}$ -free $\text{Co}_3\text{O}_4$ -modified Pt/C | 1.77                                                     | 0.02                         | 20.80                                  |

Table. S3 Comparison of the AOR performances for Pt-based electrocatalysts in 1 M KOH + 0.1 M NH<sub>3</sub> at 25 °C.

| Catalyst                                                | Scan rate<br>(mV s <sup>-1</sup> ) | Mass activity<br>(A g <sub>PGM</sub> <sup>-1</sup> ) | Specific activity<br>(mA cm <sup>-2</sup> ) | Reference |
|---------------------------------------------------------|------------------------------------|------------------------------------------------------|---------------------------------------------|-----------|
| V <sub>0</sub> -rich CoO <sub>x</sub> -modified Pt/C    | 5                                  | 165                                                  | 1.20                                        | This work |
| Pt <sub>7</sub> Ir <sub>3</sub> /XC-72                  | 5                                  | 39                                                   | N/A                                         | 1         |
| <sup>(100)</sup> Pt <sub>85</sub> Pd <sub>15</sub> /rGO | 5                                  | 165                                                  | N/A                                         | 2         |
| Pt <sub>7</sub> Co <sub>2</sub> -N-C                    | 5                                  | 74                                                   | N/A                                         | 3         |
| Ni <sub>7</sub> -Pt <sub>86</sub> Mo <sub>7</sub>       | 5                                  | 95                                                   | N/A                                         | 4         |
| PtRuFeCoNi                                              | 5                                  | 199                                                  | 2.49                                        | 5         |
| PtIrNi <sub>1</sub> /SiO <sub>2</sub> -CNT-COOH         | 5                                  | 124                                                  | N/A                                         | 6         |
| Pt/CeO <sub>x</sub> -650                                | 10                                 | 329                                                  | N/A                                         | 7         |
| PtZn-Nb <sub>2</sub> O <sub>5</sub> /C                  | 10                                 | 304                                                  | N/A                                         | 8         |
| PtCoSn/C                                                | 10                                 | 238                                                  | 0.87                                        | 9         |

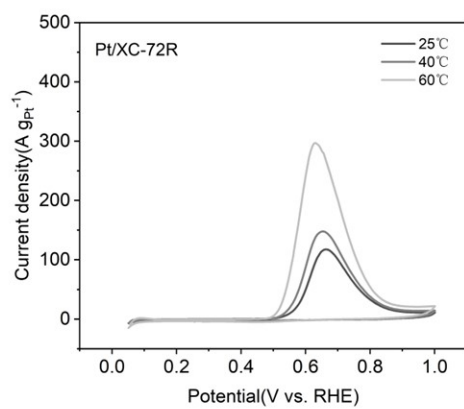

Figure. S7 CV tests of Pt/XC-72R at different temperatures.

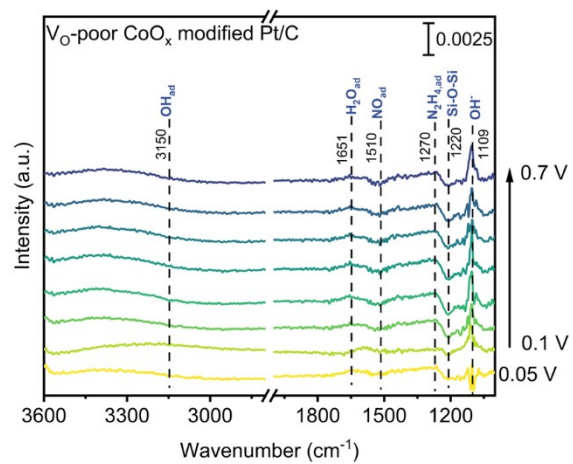

Figure. S8 *In-situ* FTIR spectra of  $V_{O}$ -poor  $CoO_x$  modified Pt/XC-72R.

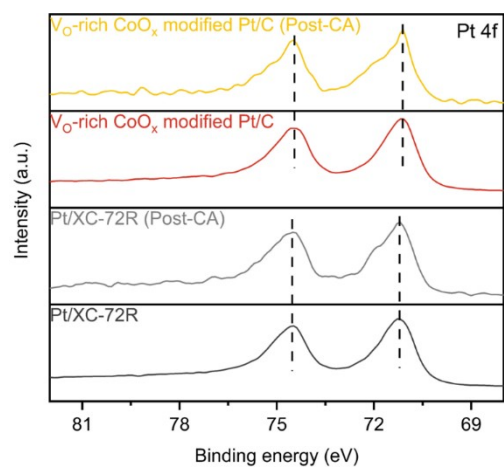

Figure. S9 Pt 4f XPS spectra of Pt/XC-72R and  $V_O$ -rich  $CoO_x$  modified Pt/C pre and post-CA.

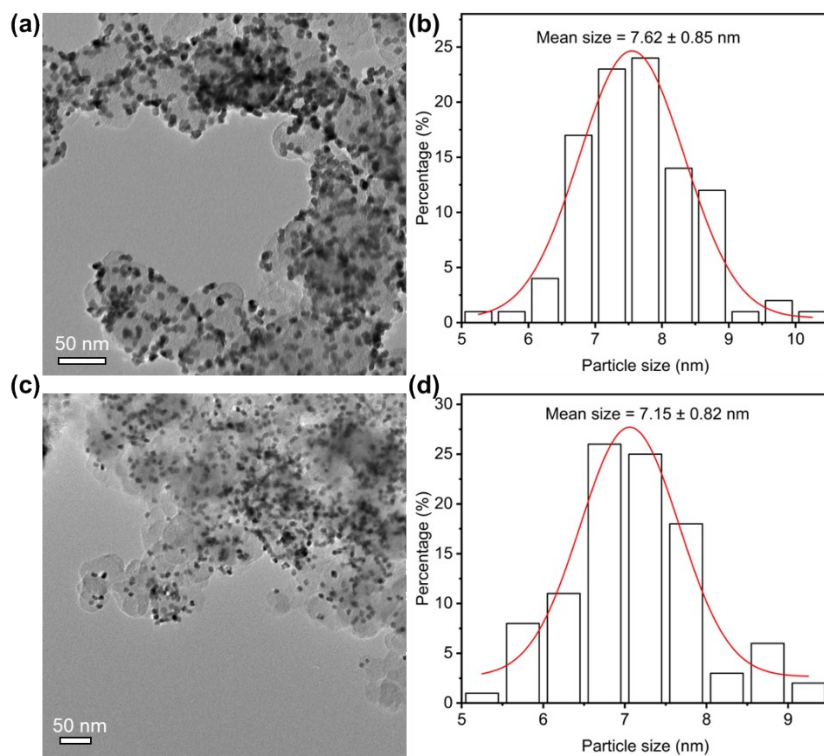

Figure. S10 TEM images of (a) Pt/XC-72R, (c) V<sub>O</sub>-rich CoO<sub>x</sub> modified Pt/C and corresponding particle size distribution histograms of (b) Pt/XC-72R and (d) V<sub>O</sub>-rich CoO<sub>x</sub> modified Pt/C post-CA tests

### 【Reference】

1. H. Fang, C. Liao, Q. Cai, F. Zhong, L. Lin, C. Chen, Y. Luo and L. Jiang, *Chemical Engineering Science*, 2023, 280, 118836.
2. Z. Liu, Y. Li, X. Zhang, S. Rao, J. Li, W. Wang, Z. Sun and J. Yang, *ACS Applied Materials & Interfaces*, 2022, 14, 28816-28825.
3. F. Fang, Q. Cheng, M. Wang, Y. He, Y. Huan, S. Liu, T. Qian, C. Yan and J. Lu, *ACS Nano*, 2025, 19, 1260-1270.
4. S. Liu, Y. Jiang, M. Wang, Y. Huan, Y. He, Q. Cheng, Y. Cheng, J. Liu, X. Zhou, T. Qian and C. Yan, *Advanced Functional Materials*, 2023, 33, 2306204.
5. T. Hu, Z. Zhang, S. Wang, Y. Wang, J. Yang and Y. Li, *Journal of Electroanalytical Chemistry*, 2025, 995, 119302.
6. Y. Li, X. Li, H. S. Pillai, J. Lattimer, N. Mohd Adli, S. Karakalos, M. Chen, L. Guo, H. Xu, J. Yang, D. Su, H. Xin and G. Wu, *ACS Catalysis*, 2020, 10, 3945-3957.
7. T. Yu, S. Yin, Z. Zhai, H. Wen, L. Luo and S. Yin, *Journal of Energy Chemistry*, 2025, 103, 858-865.
8. K. Tan, T. Yu, Z. Zhai, H. Wen, Y. Zou and S. Yin, *Langmuir*, 2024, 40, 788-796.
9. C. Dai, X. Yuan, Y. Wang, X. Liu, C. Ju, L. Hu, S. He, R. Shi, Y. Liu, J. Zhang, Y. Zhu and J. Wang, *Small*, 2025, 21, 2501582.
